# Supplementary material for: Fish Skin Mucus Extracts: An Underexplored Source of Antimicrobial Agents
Source: MDPI journal article supplement (doi:10.3390/md21060350), 2023-06-07
Supplement: s1 [file s1]

Review

# Fish Skin Mucus Extracts: An Underexplored Source of Antimicrobial Agents

Rocío Díaz-Puertas <sup>1</sup>, Mikolaj Adamek <sup>2</sup>, Ricardo Mallavia <sup>1</sup> and Alberto Falco <sup>1,\*</sup>

<sup>1</sup> Institute of Research, Development and Innovation in Healthcare Biotechnology in Elche (iDiBE), Miguel Hernández University, 03202 Elche, Spain; r.diaz@umh.es (R.D.-P.); r.mallavia@umh.es (R.M.)

<sup>2</sup> Fish Disease Research Unit, Institute for Parasitology, University of Veterinary Medicine, 30559 Hannover, Germany; mikolaj.adamek@tiho-hannover.de

\* Correspondence: alber.falco@umh.es

## Supplementary Materials

Summary:

**Table S1:** List of antibacterial studies using aqueous skin mucus extracts from different fish species.

**Table S2:** List of antibacterial studies using organic skin mucus extracts from different fish species.

**Table S3:** List of antibacterial studies using acidic skin mucus extracts from different fish species.

**Table S4:** List of antibacterial studies using crude skin mucus from different fish species.

**Table S1.** List of antibacterial studies using aqueous skin mucus extracts from different fish species.

| Fish species                     | Extraction <sup>1</sup> | Bacteria <sup>2</sup>                                                                                                                                         |                                                                                                                                                                                                                                                                                         | Antimicrobial assay <sup>3</sup> | Ref. |
|----------------------------------|-------------------------|---------------------------------------------------------------------------------------------------------------------------------------------------------------|-----------------------------------------------------------------------------------------------------------------------------------------------------------------------------------------------------------------------------------------------------------------------------------------|----------------------------------|------|
|                                  |                         | Sensitive                                                                                                                                                     | Resistant                                                                                                                                                                                                                                                                               |                                  |      |
| <i>Amphiprion clarkii</i>        | W                       | G-: <i>Aeromonas hydrophila</i> ,<br><i>Pseudomonas fluorescens</i> , <i>Vibrio alginolyticus</i> , <i>Vibrio harveyi</i> ,<br><i>Vibrio parahaemolyticus</i> | G+: <i>Micrococcus lysodeikticus</i> ,<br><i>Staphylococcus aureus</i>                                                                                                                                                                                                                  | BD                               | [1]  |
| <i>Anabas testudineus</i>        | AB                      |                                                                                                                                                               | G+: <i>Bacillus subtilis</i> , <i>S. aureus</i><br>G-: <i>A. hydrophila</i> , <i>Escherichia coli</i> ,<br><i>Pseudomonas aeruginosa</i> , <i>Salmonella</i> spp., <i>Salmonella choleraesuis</i> , <i>Serratia marcescens</i>                                                          | AWD                              | [2]  |
| <i>Anguilla anguilla</i>         | PS                      | G+: <i>S. aureus</i> ,<br>G-: <i>V. alginolyticus</i> , <i>Vibrio fluvialis</i> , <i>V. parahaemolyticus</i>                                                  | G+: <i>Enterococcus faecium</i> ,<br><i>Staphylococcus epidermidis</i><br>G-: <i>A. hydrophila</i> , <i>E. coli</i> , <i>Klebsiella pneumoniae</i> , <i>Photobacterium damsela</i> subsp. <i>piscicida</i> , <i>P. aeruginosa</i> , <i>Salmonella typhi</i> , <i>Vibrio anguillarum</i> | DD                               | [3]  |
| <i>Arius maculatus</i>           | PS                      | G-: <i>E. coli</i> , <i>P. aeruginosa</i> , <i>Salmonella</i> spp., <i>Shigella</i> spp., <i>Vibrio cholerae</i>                                              |                                                                                                                                                                                                                                                                                         | DD                               | [4]  |
| <i>Barbonymus schwanenfeldii</i> | W                       |                                                                                                                                                               | G+: <i>Bacillus cereus</i> , <i>S. aureus</i><br>G-: <i>Shigella boydii</i> , <i>E. coli</i>                                                                                                                                                                                            | DD                               | [5]  |
| <i>Catla catla</i>               | PS                      | G-: <i>A. hydrophila</i> , <i>Aeromonas sobria</i> , <i>P. fluorescens</i> , <i>V. anguillarum</i> .                                                          |                                                                                                                                                                                                                                                                                         | DD                               | [6]  |
|                                  | PS                      | G-: <i>E. coli</i> , <i>K. pneumoniae</i> , <i>P. aeruginosa</i> , <i>S. typhi</i> , <i>V. cholerae</i>                                                       |                                                                                                                                                                                                                                                                                         | DD                               | [7]  |
| <i>Channa gachua</i>             | PS                      | G-: <i>A. hydrophila</i> , <i>E. coli</i> , <i>P. aeruginosa</i> , <i>V. anguillarum</i> ,<br><i>Vibrio fischeri</i>                                          |                                                                                                                                                                                                                                                                                         | DD                               | [8]  |
| <i>Channa marulius</i>           | PS                      | G-: <i>A. hydrophila</i> , <i>E. coli</i> , <i>P. aeruginosa</i> , <i>V. anguillarum</i> , <i>V. fischeri</i>                                                 |                                                                                                                                                                                                                                                                                         | DD                               | [8]  |
| <i>Channa micropeltes</i>        | PS                      | G-: <i>A. hydrophila</i> , <i>E. coli</i> , <i>P. aeruginosa</i> , <i>V. anguillarum</i> , <i>V. fischeri</i>                                                 |                                                                                                                                                                                                                                                                                         | DD                               | [8]  |
| <i>Channa punctatus</i>          | PS                      | G+: <i>Lactobacillus bulgaricus</i> , <i>S. aureus</i><br>G-: <i>E. coli</i> , <i>Klebsiella oxytoca</i> , <i>K. pneumoniae</i> , <i>P. aeruginosa</i> ,      |                                                                                                                                                                                                                                                                                         | DD                               | [9]  |

|                                |    |                                                                                                                                                                                                                                                        |                                                                                                                                        |        |      |
|--------------------------------|----|--------------------------------------------------------------------------------------------------------------------------------------------------------------------------------------------------------------------------------------------------------|----------------------------------------------------------------------------------------------------------------------------------------|--------|------|
| <i>Channa striatus</i>         |    | <i>Proteus mirabilis</i> , <i>S. paratyphi</i> ,<br><i>S. typhi</i> , <i>V. cholerae</i>                                                                                                                                                               |                                                                                                                                        |        |      |
|                                | PS | G-: <i>A. hydrophila</i> , <i>E. coli</i> , <i>P. aeruginosa</i> , <i>V. anguillarum</i> , <i>V. fischeri</i>                                                                                                                                          |                                                                                                                                        | DD     | [8]  |
|                                | W  | G+: <i>S. aureus</i> , <i>Micrococcus luteus</i>                                                                                                                                                                                                       | G -: <i>E. coli</i> , <i>P. aeruginosa</i> , <i>S. typhi</i>                                                                           | DD     | [10] |
|                                | W  | G-: <i>A. hydrophila</i>                                                                                                                                                                                                                               | G+: <i>B. subtilis</i><br>G-: <i>K. pneumoniae</i> , <i>P. aeruginosa</i> ,<br><i>Proteus vulgaris</i> , <i>Salmonella enteritidis</i> | DD, BD | [11] |
|                                | W  | G+: <i>L. bulgaricus</i> , <i>S. aureus</i><br>G-: <i>E. coli</i> , <i>K. oxytoca</i> , <i>P. aeruginosa</i> , <i>K. pneumoniae</i> , <i>S. paratyphi</i> , <i>S. typhi</i> , <i>P. mirabilis</i> ,<br><i>V. cholerae</i>                              |                                                                                                                                        | AWD    | [12] |
| <i>Cirrhinus mrigala</i>       | PS | G+: <i>B. subtilis</i> , <i>M. luteus</i> , <i>S. aureus</i> , <i>Streptococcus pyogenes</i><br>G-: <i>E. coli</i> , <i>P. vulgaris</i> , <i>P. aeruginosa</i> , <i>Salmonella typhimurium</i> , <i>V. cholera</i> ,<br><i>Mycobacterium smegmatis</i> |                                                                                                                                        | AWD    | [13] |
|                                | PS | G-: <i>A. hydrophila</i> , <i>E. coli</i> , <i>P. aeruginosa</i> , <i>V. anguillarum</i> , <i>V. fischeri</i>                                                                                                                                          |                                                                                                                                        | DD     | [8]  |
|                                | PS | G+: <i>L. bulgaricus</i> <i>S. aureus</i><br>G-: <i>E. coli</i> , <i>K. oxytoca</i> , <i>K. pneumoniae</i> , <i>P. aeruginosa</i> , <i>P. mirabilis</i> , <i>S. paratyphi</i> , <i>S. typhi</i> ,<br><i>V. cholerae</i>                                |                                                                                                                                        | DD     | [9]  |
| <i>Clarias batrachus</i>       | W  | G-: <i>P. aeruginosa</i> , <i>S. paratyphi</i> ,<br><i>S. typhi</i> , <i>V. cholerae</i>                                                                                                                                                               | G+: <i>S. aureus</i> ,                                                                                                                 | DD     | [14] |
|                                | AB | G+: <i>S. aureus</i><br>G-: <i>A. hydrophila</i> , <i>E. coli</i> , <i>K. pneumoniae</i> , <i>P. aeruginosa</i> , <i>P. vulgaris</i>                                                                                                                   | G+: <i>Bacillus coagulans</i>                                                                                                          | DD     | [15] |
|                                | PS | G-: <i>A. hydrophila</i> , <i>E. coli</i> , <i>P. aeruginosa</i> , <i>V. anguillarum</i> , <i>V. fischeri</i>                                                                                                                                          |                                                                                                                                        | DD     | [16] |
| <i>Ctenopharyngodon idella</i> | PS | G+: <i>B. cereus</i> , <i>S. aureus</i> , <i>S. epidermidis</i><br>G-: <i>A. hydrophila</i> , <i>E. coli</i> , <i>K. pneumoniae</i> , <i>P. aeruginosa</i>                                                                                             |                                                                                                                                        | AWD    | [17] |

|                                   |     |                                                                                                                                                                                                                                                                                                                                               |     |      |
|-----------------------------------|-----|-----------------------------------------------------------------------------------------------------------------------------------------------------------------------------------------------------------------------------------------------------------------------------------------------------------------------------------------------|-----|------|
|                                   | PS  | G-: <i>A. hydrophila</i> , <i>A. sobria</i> , <i>P. fluorescens</i> , <i>V. anguillarum</i> .                                                                                                                                                                                                                                                 | DD  | [6]  |
|                                   | PS  | G-: <i>E. coli</i> , <i>K. pneumoniae</i> , <i>P. aeruginosa</i> , <i>S. typhi</i> , <i>V. cholerae</i>                                                                                                                                                                                                                                       | DD  | [7]  |
| <i>Cyprinus carpio</i>            | AB  | G+: <i>S. epidermis</i><br>G-: <i>Aeromonas salmonicida</i> , <i>E. coli</i> ,<br><i>Listonella anguillarum</i> , <i>P. aeruginosa</i> , <i>Salmonella enterica</i> ,<br><i>Yersinia ruckeri</i>                                                                                                                                              | BD  | [18] |
|                                   | PS  | G+: <i>S. epidermis</i><br>G-: <i>A. salmonicida</i> , <i>E. coli</i> , <i>L. anguillarum</i> , <i>P. aeruginosa</i> , <i>S. enterica</i> , <i>Y. ruckeri</i>                                                                                                                                                                                 | AWD | [17] |
| <i>Dentex dentex</i>              | TBS | G+: <i>B. subtilis</i><br>G-: <i>E. coli</i> , <i>P. damsela</i> , <i>Shewanella putrefaciens</i> , <i>V. harveyi</i> ,<br><i>V. anguillarum</i>                                                                                                                                                                                              | OD  | [19] |
| <i>Dicentrarchus labrax</i>       | PS  | G+: <i>S. aureus</i><br>G-: <i>P. damsela</i> subsp. <i>piscicida</i> , <i>Tenacibaculum maritimum</i> , <i>V. anguillarum</i> , <i>V. damsela</i>                                                                                                                                                                                            | DD  | [20] |
|                                   | PS  | G+: <i>S. aureus</i><br>G-: <i>V. alginolyticus</i> , <i>V. fluvialis</i> ,<br><i>V. parahaemolyticus</i><br>G+: <i>E. faecium</i> , <i>S. epidermidis</i><br>G-: <i>A. hydrophila</i> , <i>E. coli</i> , <i>K. pneumoniae</i> , <i>P. damsela</i> subsp. <i>piscicida</i> , <i>P. aeruginosa</i> , <i>S. typhi</i> , <i>V. anguillarum</i> , | DD  | [3]  |
|                                   | TBS | G+: <i>B. subtilis</i><br>G-: <i>E. coli</i> , <i>P. damsela</i> , <i>S. putrefaciens</i> , <i>V. harveyi</i> , <i>V. anguillarum</i>                                                                                                                                                                                                         | OD  | [19] |
|                                   | TBS | G+: <i>B. subtilis</i><br>G-: <i>E. coli</i> , <i>P. damsela</i> , <i>S. putrefaciens</i> , <i>V. harveyi</i> , <i>V. anguillarum</i>                                                                                                                                                                                                         | OD  | [19] |
| <i>Epinephelus marginatus</i>     | TBS | G+: <i>B. subtilis</i><br>G-: <i>E. coli</i> , <i>P. damsela</i> , <i>S. putrefaciens</i> , <i>V. harveyi</i> , <i>V. anguillarum</i>                                                                                                                                                                                                         | OD  | [19] |
| <i>Epinephelus tauvina</i>        | AB  | G-: <i>A. hydrophila</i> , <i>E. coli</i> , <i>S. typhi</i> , <i>K. pneumonia</i> , <i>P. mirabilis</i> , <i>P. fluorescens</i> , <i>V. alginolyticus</i> , <i>V. harveyi</i> , <i>V. parahaemolyticus</i>                                                                                                                                    | AWD | [21] |
| <i>Heteropneustes fossilis</i>    | PS  | G+: <i>B. subtilis</i> , <i>M. luteus</i> , <i>S. aureus</i> , <i>S. pyogenes</i><br>G-: <i>E. coli</i> , <i>P. vulgaris</i> , <i>P. aeruginosa</i> , <i>S. typhimurium</i> , <i>V. cholera</i> , <i>M. smegmatis</i>                                                                                                                         | AWD | [13] |
| <i>Hypophthalmichthys nobilis</i> | PS  | G+: <i>B. cereus</i> , <i>S. aureus</i> , <i>S. epidermidis</i>                                                                                                                                                                                                                                                                               | AWD | [17] |

|                                 |    |                                                                                                                                                                                                                                                         |          |      |
|---------------------------------|----|---------------------------------------------------------------------------------------------------------------------------------------------------------------------------------------------------------------------------------------------------------|----------|------|
|                                 |    | G-: <i>A. hydrophila</i> , <i>E. coli</i> , <i>K. pneumoniae</i> , <i>P. aeruginosa</i>                                                                                                                                                                 |          |      |
|                                 | PS | G-: <i>A. hydrophila</i> , <i>A. sobria</i> , <i>P. fluorescens</i> , <i>V. anguillarum</i> .                                                                                                                                                           | DD       | [6]  |
|                                 | PS | G-: <i>E. coli</i> , <i>K. pneumoniae</i> , <i>P. aeruginosa</i> , <i>S. typhi</i> , <i>V. cholerae</i>                                                                                                                                                 | DD       | [7]  |
|                                 | PS | G+: <i>B. cereus</i> , <i>S. aureus</i> , <i>S. epidermidis</i><br>G-: <i>A. hydrophila</i> , <i>E. coli</i> , <i>K. pneumoniae</i> , <i>P. aeruginosa</i> ,                                                                                            | AWD, APD | [22] |
| <i>Labeo rohita</i>             | PS | G-: <i>A. hydrophila</i> , <i>A. sobria</i> , <i>P. fluorescens</i> , <i>V. anguillarum</i> .                                                                                                                                                           | DD       | [6]  |
|                                 | PS | G-: <i>E. coli</i> , <i>K. pneumoniae</i> , <i>P. aeruginosa</i> , <i>S. typhi</i> , <i>V. cholerae</i>                                                                                                                                                 | DD       | [7]  |
| <i>Labrus bergylta</i>          | W  | G+: <i>B. cereus</i> , <i>B. subtilis</i> , <i>Bacillus megaterium</i> , <i>S. aureus</i> , <i>Streptococcus sp.</i><br>G-: <i>E. coli</i> , <i>K. pneumoniae</i> , <i>P. vulgaris</i> , <i>P. aeruginosa</i> , <i>S. marcescens</i>                    | AWD, BD  | [23] |
|                                 | W  | G+: <i>B. subtilis</i> , <i>Lactobacillus plantarum</i><br>G-: <i>A. sobria</i> , <i>Citrobacter sp.</i> , <i>Edwardsiella tarda</i> , <i>E. coli</i> , <i>Enterobacter sp.</i> , <i>L. anguillarum</i> , <i>Shewanella baltica</i> , <i>Y. ruckeri</i> | DD       | [24] |
|                                 | AB | G+: <i>S. epidermis</i><br>G-: <i>A. salmonicida</i> , <i>E. coli</i> , <i>L. anguillarum</i> , <i>P. aeruginosa</i> , <i>S. enterica</i> , <i>Y. ruckeri</i>                                                                                           | BD       | [18] |
|                                 | AB | G+: <i>S. epidermis</i><br>G-: <i>A. salmonicida</i> , <i>E. coli</i> , <i>L. anguillarum</i> , <i>P. aeruginosa</i> , <i>S. enterica</i> , <i>Y. ruckeri</i>                                                                                           | BD       | [18] |
| <i>Melanogrammus aeglefinus</i> | AB | G+: <i>S. epidermis</i><br>G-: <i>A. salmonicida</i> , <i>E. coli</i> , <i>L. anguillarum</i> , <i>P. aeruginosa</i> , <i>S. enterica</i> , <i>Y. ruckeri</i>                                                                                           | BD       | [18] |
| <i>Morone saxatilis</i>         | AB | G+: <i>S. epidermis</i><br>G-: <i>A. salmonicida</i> , <i>E. coli</i> , <i>L. anguillarum</i> , <i>P. aeruginosa</i> , <i>S. enterica</i> , <i>Y. ruckeri</i>                                                                                           | BD       | [18] |
| <i>Myxine glutinosa</i>         | AB | G-: <i>S. enterica</i>                                                                                                                                                                                                                                  | BD       | [18] |
| <i>Oreochromis niloticus</i>    | W  | G-: <i>V. harveyi</i> , <i>V. parahaemolyticus</i>                                                                                                                                                                                                      | BD, OD   | [25] |
| <i>Oreochromis mossambicus</i>  | AB | G+: <i>S. aureus</i><br>G-: <i>A. hydrophila</i> , <i>E. coli</i> , <i>K. pneumoniae</i> , <i>P. aeruginosa</i> , <i>P. vulgaris</i>                                                                                                                    | DD       | [15] |
|                                 | PS | G+: <i>E. faecium</i> , <i>S. aureus</i> , <i>S. epidermidis</i><br>G-: <i>V. parahaemolyticus</i><br>G-: <i>A. hydrophila</i> , <i>E. coli</i> , <i>K. pneumoniae</i> , <i>P. damsela</i> subsp.                                                       | DD       | [3]  |

|                                    |     |                                                                                                                                                                                                                                |                                                                                                                                                               |         |      |
|------------------------------------|-----|--------------------------------------------------------------------------------------------------------------------------------------------------------------------------------------------------------------------------------|---------------------------------------------------------------------------------------------------------------------------------------------------------------|---------|------|
|                                    |     |                                                                                                                                                                                                                                | <i>iscicida</i> , <i>P. aeruginosa</i> , <i>S. typhi</i> , <i>V. alginolyticus</i> , <i>V. anguillarum</i> , <i>V. fluvialis</i>                              |         |      |
| <i>Periophthalmodon schlosseri</i> | PS  | G+: <i>Bacillus anthracis</i> , <i>S. aureus</i><br>G-: <i>E. coli</i> , <i>P. mirabilis</i> , <i>P. aeruginosa</i> , <i>S. typhi</i> , <i>V. cholerae</i> , <i>K. pneumoniae</i>                                              |                                                                                                                                                               | DD, BD  | [26] |
| <i>Platichthys flesus</i>          | W   | G+: <i>B. cereus</i> , <i>B. subtilis</i> , <i>B. megaterium</i> , <i>S. aureus</i> , <i>Streptococcus</i> sp.<br>G-: <i>E. coli</i> , <i>K. pneumoniae</i> , <i>P. vulgaris</i> , <i>P. aeruginosa</i> , <i>S. marcescens</i> |                                                                                                                                                               | AWD, BD | [23] |
| <i>Pollachius virens</i>           | W   | G+: <i>B. cereus</i> , <i>B. subtilis</i> , <i>B. megaterium</i> , <i>S. aureus</i> , <i>Streptococcus</i> sp.<br>G-: <i>E. coli</i> , <i>K. pneumoniae</i> , <i>P. vulgaris</i> , <i>P. aeruginosa</i> , <i>S. marcescens</i> |                                                                                                                                                               | AWD, BD | [23] |
| <i>Rita rita</i>                   | W   | G+: <i>S. aureus</i> , <i>M. luteus</i><br>G -: <i>S. typhi</i>                                                                                                                                                                | G -: <i>E. coli</i> , <i>P. aeruginosa</i>                                                                                                                    | DD      | [10] |
| <i>Salvelinus alpinus</i>          | AB  |                                                                                                                                                                                                                                | G+: <i>S. epidermis</i><br>G-: <i>A. salmonicida</i> , <i>E. coli</i> , <i>L. anguillarum</i> , <i>P. aeruginosa</i> , <i>S. enterica</i> , <i>Y. ruckeri</i> | BD      | [18] |
| <i>Salvelinus fontinalis</i>       | AB  |                                                                                                                                                                                                                                | G+: <i>S. epidermis</i><br>G-: <i>A. salmonicida</i> , <i>E. coli</i> , <i>L. anguillarum</i> , <i>P. aeruginosa</i> , <i>S. enterica</i> , <i>Y. ruckeri</i> | BD      | [18] |
| <i>Scaphthalmus rhombus</i>        | W   | G+: <i>B. cereus</i> , <i>B. subtilis</i> , <i>B. megaterium</i> , <i>S. aureus</i> , <i>Streptococcus</i> sp.<br>G-: <i>E. coli</i> , <i>K. pneumoniae</i> , <i>P. vulgaris</i> , <i>P. aeruginosa</i> , <i>S. marcescens</i> |                                                                                                                                                               | AWD, BD | [23] |
| <i>Scophthalmus maximus</i>        | PS  | G+: <i>S. aureus</i><br>G-: <i>P. damsela</i> subsp. <i>piscicida</i> , <i>V. anguillarum</i>                                                                                                                                  | G-: <i>T. maritimum</i> , <i>V. damsela</i>                                                                                                                   | DD      | [20] |
| <i>Solea senegalensis</i>          | TBS | G+: <i>B. subtilis</i><br>G-: <i>E. coli</i> , <i>P. damsela</i> subsp. <i>piscicida</i> , <i>S. putrefaciens</i> , <i>V. anguillarum</i> , <i>V. harveyi</i>                                                                  |                                                                                                                                                               | OD      | [27] |

|                      |     |                                                                                                                                                                                                                                   |                                                                                                                 |         |      |
|----------------------|-----|-----------------------------------------------------------------------------------------------------------------------------------------------------------------------------------------------------------------------------------|-----------------------------------------------------------------------------------------------------------------|---------|------|
| <i>Solea solea</i>   | W   | G+: <i>B. cereus</i> , <i>B. subtilis</i> , <i>B. megaterium</i> , <i>S. aureus</i> ,<br><i>Streptococcus</i> sp.<br>G-: <i>E. coli</i> , <i>K. pneumoniae</i> , <i>P. vulgaris</i> , <i>P. aeruginosa</i> , <i>S. marcescens</i> |                                                                                                                 | AWD, BD | [23] |
|                      | PS  | G+: <i>S. aureus</i>                                                                                                                                                                                                              | G-: <i>P. damsela</i> subsp. <i>piscicida</i> , <i>T. maritimum</i> , <i>V. anguillarum</i> , <i>V. damsela</i> | DD      | [20] |
| <i>Sparus aurata</i> | TBS | G+: <i>B. subtilis</i><br>G-: <i>E. coli</i> , <i>P. damsela</i> , <i>S. putrefaciens</i> , <i>V. harveyi</i> , <i>V. anguillarum</i>                                                                                             |                                                                                                                 | OD      | [19] |
|                      | TBS | G+: <i>B. subtilis</i><br>G-: <i>E. coli</i> , <i>P. damsela</i> , <i>S. putrefaciens</i> , <i>V. harveyi</i> , <i>V. anguillarum</i>                                                                                             |                                                                                                                 | OD      | [19] |

<sup>1</sup> AB: ammonium bicarbonate; PS: physiological saline; W: water; TBS: tris buffered saline

<sup>2</sup> G+: gram-positive; G-: gram-negative

<sup>3</sup> APD: agar plate dilution; AWD: agar well diffusion; BD: broth dilution; DD: disc diffusion; OD: optical density

**Table S2.** List of antibacterial studies using organic skin mucus extracts from different fish species.

| Fish species                       | Extraction <sup>1</sup> | Bacteria <sup>2</sup>                                                                                                                                                                 |                                                                                                                                                                                                                                                                              | Antimicrobial assay <sup>3</sup> | Ref. |
|------------------------------------|-------------------------|---------------------------------------------------------------------------------------------------------------------------------------------------------------------------------------|------------------------------------------------------------------------------------------------------------------------------------------------------------------------------------------------------------------------------------------------------------------------------|----------------------------------|------|
|                                    |                         | Sensitive                                                                                                                                                                             | Resistant                                                                                                                                                                                                                                                                    |                                  |      |
| <i>Barbonymus Schwanenfeldii</i>   | ET, DCM                 | G+: <i>Bacillus cereus</i> ,<br><i>Staphylococcus aureus</i><br>G-: <i>Shigella boydii</i> , <i>Escherichia coli</i>                                                                  |                                                                                                                                                                                                                                                                              | DD                               | [5]  |
| <i>Cyprinus carpio</i>             | DCM                     | G-: <i>Salmonella enterica</i>                                                                                                                                                        |                                                                                                                                                                                                                                                                              | BD                               | [18] |
| <i>Epinephelus tauvina</i>         | ET                      |                                                                                                                                                                                       | G-: <i>Aeromonas hydrophila</i> , <i>E. coli</i> , <i>Salmonella typhi</i> , <i>Klebsiella pneumoniae</i> , <i>Proteus mirabilis</i> , <i>Pseudomonas fluorescens</i> , <i>Vibrio alginolyticus</i> , <i>Vibrio harveyi</i> , <i>Vibrio parahaemolyticus</i>                 | AWD                              | [21] |
| <i>Gadus morhua</i>                | ACN + 1% TFA            | G+: <i>Bacillus megaterium</i><br>G-: <i>E. coli</i>                                                                                                                                  |                                                                                                                                                                                                                                                                              | AWD, BD                          | [28] |
| <i>Labrus bergylta</i>             | DCM                     | G-: <i>E. coli</i> , <i>K. pneumoniae</i> , <i>Proteus vulgaris</i> , <i>Pseudomonas aeruginosa</i> , <i>Serratia marcescens</i>                                                      | G+: <i>B. cereus</i> , <i>Bacillus subtilis</i> , <i>B. megaterium</i> , <i>S. aureus</i> , <i>Streptococcus sp.</i>                                                                                                                                                         | AWD, BD                          | [23] |
|                                    | DCM                     |                                                                                                                                                                                       | G+: <i>B. subtilis</i> , <i>Lactobacillus plantarum</i><br>G-: <i>Aeromonas sobria</i> , <i>Citrobacter sp.</i> , <i>Edwardsiella tarda</i> , <i>E. coli</i> , <i>Enterobacter sp.</i> , <i>Listonella anguillarum</i> , <i>Shewanella baltica</i> , <i>Yersinia ruckeri</i> | DD                               | [24] |
| <i>Melanogrammus aeglefinus</i>    | DCM                     |                                                                                                                                                                                       | G-: <i>S. enterica</i>                                                                                                                                                                                                                                                       | BD                               | [18] |
| <i>Morone saxatilis</i>            | DCM                     | G-: <i>S. enterica</i>                                                                                                                                                                |                                                                                                                                                                                                                                                                              | BD                               | [18] |
| <i>Myxine glutinosa</i>            | DCM                     |                                                                                                                                                                                       | G-: <i>S. enterica</i>                                                                                                                                                                                                                                                       | BD                               | [18] |
| <i>Oreochromis niloticus</i>       | DCM                     | G-: <i>V. harveyi</i>                                                                                                                                                                 | G-: <i>V. parahaemolyticus</i>                                                                                                                                                                                                                                               | BD, OD                           | [25] |
|                                    | ET                      | G-: <i>V. harveyi</i>                                                                                                                                                                 |                                                                                                                                                                                                                                                                              | DD, BD                           | [29] |
| <i>Periophthalmodon schlosseri</i> | ET                      | G+: <i>Bacillus anthracis</i> , <i>S. aureus</i><br>G-: <i>E. coli</i> , <i>P. mirabilis</i> , <i>P. aeruginosa</i> , <i>S. typhi</i> , <i>Vibrio cholerae</i> , <i>K. pneumoniae</i> |                                                                                                                                                                                                                                                                              | DD, BD                           | [26] |
| <i>Platichthys flesus</i>          | DCM                     | G+: <i>B. cereus</i> , <i>B. subtilis</i> , <i>B. megaterium</i> , <i>S. aureus</i> , <i>Streptococcus sp.</i><br>G-: <i>E. coli</i> , <i>K. pneumoniae</i> , <i>P. vulgaris</i> ,    |                                                                                                                                                                                                                                                                              | AWD, BD                          | [23] |



|                              |     |                                                                                                                                                                                                                                         |                        |         |
|------------------------------|-----|-----------------------------------------------------------------------------------------------------------------------------------------------------------------------------------------------------------------------------------------|------------------------|---------|
|                              |     | <i>P. aeruginosa</i> , <i>S. marcescens</i>                                                                                                                                                                                             |                        |         |
| <i>Pollachius virens</i>     | DCM | G+: <i>B. cereus</i> , <i>B. subtilis</i> ,<br><i>B. megaterium</i> , <i>S. aureus</i> ,<br><i>Streptococcus</i> sp.<br>G-: <i>E. coli</i> , <i>K. pneumoniae</i> , <i>P. vulgaris</i> ,<br><i>P. aeruginosa</i> , <i>S. marcescens</i> | AWD, BD                | [23]    |
| <i>Salvelinus alpinus</i>    | DCM |                                                                                                                                                                                                                                         | G-: <i>S. enterica</i> | BD [18] |
| <i>Salvelinus fontinalis</i> | DCM |                                                                                                                                                                                                                                         | G-: <i>S. enterica</i> | BD [18] |
| <i>Scaphthalmus rhombus</i>  | DCM | G+: <i>B. cereus</i> , <i>B. subtilis</i> ,<br><i>B. megaterium</i> , <i>S. aureus</i> ,<br><i>Streptococcus</i> sp.<br>G-: <i>E. coli</i> , <i>K. pneumoniae</i> , <i>P. vulgaris</i> ,<br><i>P. aeruginosa</i> , <i>S. marcescens</i> | AWD, BD                | [23]    |
| <i>Solea solea</i>           | DCM | G+: <i>B. cereus</i> , <i>B. subtilis</i> ,<br><i>B. megaterium</i> , <i>S. aureus</i> ,<br><i>Streptococcus</i> sp.<br>G-: <i>E. coli</i> , <i>K. pneumoniae</i> , <i>P. vulgaris</i> ,<br><i>P. aeruginosa</i> , <i>S. marcescens</i> | AWD, BD                | [23]    |

<sup>1</sup> ACN: acetonitrile; DCM: dichloromethane; ET: ethanol; TFA: trifluoroacetic acid.

<sup>2</sup> G+: gram-positive; G-: gram-negative

<sup>3</sup> AWD: agar well diffusion; BD: broth dilution; DD: disc diffusion; OD: optical density

**Table S3.** List of antibacterial studies using acidic skin mucus extracts from different fish species.

| Fish species                    | Extraction <sup>1</sup> | Bacteria <sup>2</sup>                                                                                                                                                                                                                |                                                                                                                                                                                                        | Antimicrobial assay <sup>3</sup> | Ref. |
|---------------------------------|-------------------------|--------------------------------------------------------------------------------------------------------------------------------------------------------------------------------------------------------------------------------------|--------------------------------------------------------------------------------------------------------------------------------------------------------------------------------------------------------|----------------------------------|------|
|                                 |                         | Sensitive                                                                                                                                                                                                                            | Resistant                                                                                                                                                                                              |                                  |      |
| <i>Anabas testudineus</i>       | AA                      | G+: <i>Bacillus subtilis</i> , <i>Staphylococcus aureus</i>                                                                                                                                                                          |                                                                                                                                                                                                        | AWD                              | [2]  |
|                                 |                         | G-: <i>Aeromonas hydrophila</i> , <i>Escherichia coli</i> , <i>Pseudomonas aeruginosa</i> , <i>Salmonella spp.</i> , <i>Salmonella choleraesuis</i> , <i>Serratia marcescens</i>                                                     |                                                                                                                                                                                                        |                                  |      |
| <i>Channa punctatus</i>         | AA, TFA                 | G+: <i>S. aureus</i> , <i>Micrococcus luteus</i>                                                                                                                                                                                     | G -: <i>E. coli</i> , <i>P. aeruginosa</i> , <i>Salmonella typhi</i>                                                                                                                                   | DD                               | [10] |
| <i>Channa striatus</i>          | AA                      | G+: <i>B. subtilis</i>                                                                                                                                                                                                               |                                                                                                                                                                                                        | DD, BD                           | [11] |
|                                 |                         | G-: <i>A. hydrophila</i> , <i>Klebsiella pneumoniae</i> , <i>P. aeruginosa</i> , <i>Proteus vulgaris</i> , <i>Salmonella enteritidis</i>                                                                                             |                                                                                                                                                                                                        |                                  |      |
|                                 | AA                      | G+: <i>Enterococcus faecalis</i> , <i>M. luteus</i> , <i>S. aureus</i> ,<br>G-: <i>A. hydrophila</i> , <i>E. coli</i> , <i>K. pneumoniae</i> , <i>P. aeruginosa</i>                                                                  |                                                                                                                                                                                                        | AWD                              | [30] |
| <i>Cirrhinus mrigala</i>        | AA                      | G+: <i>S. aureus</i> ,<br>G-: <i>P. aeruginosa</i> , <i>S. paratyphi</i> , <i>S. typhi</i> , <i>V. cholerae</i>                                                                                                                      |                                                                                                                                                                                                        | DD                               | [14] |
|                                 | TFA                     | G-: <i>S. paratyphi</i> , <i>V. cholerae</i>                                                                                                                                                                                         | G+: <i>S. aureus</i> ,<br>G-: <i>P. aeruginosa</i> , <i>S. typhi</i>                                                                                                                                   | DD                               | [14] |
| <i>Clarias batrachus</i>        | AA                      | G+: <i>E. faecalis</i> , <i>M. luteus</i> , <i>S. aureus</i><br>G-: <i>A. hydrophila</i> , <i>E. coli</i> , <i>K. pneumoniae</i> , <i>P. aeruginosa</i>                                                                              |                                                                                                                                                                                                        | AWD                              | [30] |
| <i>Cyprinus carpio</i>          | AA                      |                                                                                                                                                                                                                                      | G+: <i>Staphylococcus epidermis</i><br>G-: <i>Aeromonas salmonicida</i> , <i>E. coli</i> , <i>Listonella anguillarum</i> , <i>P. aeruginosa</i> , <i>Salmonella enterica</i> , <i>Yersinia ruckeri</i> | BD                               | [18] |
| <i>Epinephelus tauvina</i>      | AA                      | G-: <i>A. hydrophila</i> , <i>E. coli</i> , <i>S. typhi</i> , <i>K. pneumonia</i> , <i>Proteus mirabilis</i> , <i>Pseudomonas fluorescens</i> , <i>Vibrio alginolyticus</i> , <i>Vibrio harveyi</i> , <i>Vibrio parahaemolyticus</i> |                                                                                                                                                                                                        | AWD                              | [21] |
| <i>Melanogrammus aeglefinus</i> | AA                      | G+: <i>S. epidermis</i><br>G-: <i>A. salmonicida</i> , <i>E. coli</i> , <i>L. anguillarum</i> , <i>P. aeruginosa</i> , <i>S. enterica</i> , <i>Y. ruckeri</i>                                                                        |                                                                                                                                                                                                        | BD                               | [18] |
| <i>Morone saxatilis</i>         | AA                      |                                                                                                                                                                                                                                      | G-: <i>S. enterica</i>                                                                                                                                                                                 | BD                               | [18] |

|                              |         |                                                                                                                                                           |        |      |
|------------------------------|---------|-----------------------------------------------------------------------------------------------------------------------------------------------------------|--------|------|
| <i>Myxine glutinosa</i>      | AA      | G+: <i>S. epidermis</i>                                                                                                                                   | BD     | [18] |
|                              |         | G-: <i>A. salmonicida</i> , <i>E. coli</i> , <i>L. anguillarum</i> , <i>P. aeruginosa</i> , <i>S. enterica</i> ,<br><i>Y. ruckeri</i>                     |        |      |
| <i>Oreochromis niloticus</i> | AA      | G-: <i>V. harveyi</i>                                                                                                                                     | BD, OD | [25] |
|                              | AA      | G+: <i>E. faecalis</i> , <i>M. luteus</i> , <i>S. aureus</i> ,<br>G-: <i>A. hydrophila</i> , <i>E. coli</i> , <i>K. pneumoniae</i> , <i>P. aeruginosa</i> | AWD    | [30] |
| <i>Puntius sophore</i>       | AA      | G+: <i>B. subtilis</i> , <i>S. aureus</i><br>G-: <i>E. coli</i> , <i>P. aeruginosa</i>                                                                    | AWD    | [31] |
| <i>Rita rita</i>             | AA, TFA | G+: <i>S. aureus</i> and <i>M. luteus</i><br>G -: <i>S. typhi</i>                                                                                         | DD     | [10] |
| <i>Salvelinus alpinus</i>    | AA      | G-: <i>S. enterica</i>                                                                                                                                    | BD     | [18] |
| <i>Salvelinus fontinalis</i> | AA      | G+: <i>S. epidermis</i>                                                                                                                                   | BD     | [18] |
|                              |         | G-: <i>A. salmonicida</i> , <i>E. coli</i> , <i>L. anguillarum</i> , <i>P. aeruginosa</i> , <i>Salmonella enterica</i> , <i>Y. ruckeri</i>                |        |      |

<sup>1</sup> AA: acetic acid TFA: trifluoroacetic acid.

<sup>2</sup> G+: gram-positive; G-: gram-negative

<sup>3</sup> AWD: agar well diffusion; BD: broth dilution; DD: disc diffusion; OD: optical density

**Table S4.** List of antibacterial studies using crude skin mucus from different fish species.

| Fish species                   | Bacteria <sup>1</sup>                                                                                                                                                        |                                                                                                                                                                                                                                                                                                                                                     | Antimicrobial assay <sup>2</sup> | Ref. |
|--------------------------------|------------------------------------------------------------------------------------------------------------------------------------------------------------------------------|-----------------------------------------------------------------------------------------------------------------------------------------------------------------------------------------------------------------------------------------------------------------------------------------------------------------------------------------------------|----------------------------------|------|
|                                | Sensitive                                                                                                                                                                    | Resistant                                                                                                                                                                                                                                                                                                                                           |                                  |      |
| <i>Argyrosomus regius</i>      | G-: <i>Escherichia coli</i> , <i>Pseudomonas anguilliseptica</i> , <i>Vibrio anguillarum</i>                                                                                 |                                                                                                                                                                                                                                                                                                                                                     | OD                               | [32] |
| <i>Channa argus</i>            | G-: <i>E. coli</i>                                                                                                                                                           |                                                                                                                                                                                                                                                                                                                                                     | OD                               |      |
| <i>Channa striatus</i>         | G-: <i>A. hydrophila</i>                                                                                                                                                     | G+: <i>Bacillus subtilis</i><br>G-: <i>Klebsiella pneumoniae</i> , <i>Pseudomonas aeruginosa</i> ,<br><i>Proteus vulgaris</i> , <i>Salmonella enteritidis</i>                                                                                                                                                                                       | DD, BD                           | [11] |
| <i>Clarias batrachus</i>       | G+: <i>B. subtilis</i> ,<br><i>Staphylococcus aureus</i><br>G-: <i>K. pneumoniae</i> , <i>P. vulgaris</i> , <i>P. aeruginosa</i> , <i>S. paratyphi</i>                       |                                                                                                                                                                                                                                                                                                                                                     | DD                               | [33] |
| <i>Ctenopharyngodon idella</i> | G+: <i>Bacillus cereus</i> , <i>S. aureus</i> , <i>Staphylococcus epidermidis</i><br>G-: <i>A. hydrophila</i> , <i>E. coli</i> , <i>K. pneumoniae</i> , <i>P. aeruginosa</i> |                                                                                                                                                                                                                                                                                                                                                     | AWD                              | [17] |
| <i>Cyprinus carpio</i>         | G+: <i>B. cereus</i> , <i>S. aureus</i> , <i>S. epidermidis</i><br>G-: <i>A. hydrophila</i> , <i>E. coli</i> , <i>K. pneumoniae</i> , <i>P. aeruginosa</i>                   |                                                                                                                                                                                                                                                                                                                                                     | AWD                              | [17] |
| <i>Dasyatis pastinaca</i>      | G-: <i>E. coli</i> , <i>K. pneumoniae</i> , <i>P. aeruginosa</i>                                                                                                             | G+: <i>E. faecalis</i> , <i>S. aureus</i> , <i>Streptococcus agalactiae</i>                                                                                                                                                                                                                                                                         | CC                               | [34] |
| <i>Dicentrarchus labrax</i>    | G-: <i>E. coli</i> , <i>V. anguillarum</i>                                                                                                                                   | G-: <i>Pseudomonas anguilliseptica</i>                                                                                                                                                                                                                                                                                                              | OD                               | [32] |
| <i>Oncorhynchus mykiss</i>     |                                                                                                                                                                              | G+: <i>B. cereus</i> , <i>S. aureus</i> , <i>S. pneumoniae</i><br>G-: <i>Citrobacter freundii</i> , <i>Enterobacter aerogenes</i> , <i>E. coli</i> ,<br><i>Klebsiella oxytoca</i> , <i>K. pneumoniae</i> , <i>Neisseria lactamica</i> ,<br><i>Proteus mirabilis</i> , <i>Pseudomonas fluorescens</i> , <i>P. vulgaris</i> ,<br><i>P. aeruginosa</i> | DD                               | [35] |
| <i>Sparus aurata</i>           | G-: <i>E. coli</i> , <i>Pseudomonas anguilliseptica</i> , <i>V. anguillarum</i> ,                                                                                            |                                                                                                                                                                                                                                                                                                                                                     | OD                               | [32] |

<sup>1</sup> G+: Gram-positive; G-: Gram-negative<sup>2</sup> AWD: agar well diffusion; BD: broth dilution; CC: cell counting; DD: disc diffusion; OD: optical density

## References

1. Wang, H.; Tang, W.; Zhang, R.; Ding, S., Analysis of enzyme activity, antibacterial activity, antiparasitic activity and physico-chemical stability of skin mucus derived from *Amphiprion clarkii*. *Fish & Shellfish Immunology* **2019**, *86*, 653-661.
2. Al-Rasheed, A.; Handool, K. O.; Garba, B.; Noordin, M. M.; Bejo, S. K.; Kamal, F. M.; Daud, H. H. M., Crude extracts of epidermal mucus and epidermis of climbing perch *Anabas testudineus* and its antibacterial and hemolytic activities. *The Egyptian Journal of Aquatic Research* **2018**, *44*, (2), 125-129.
3. Caruso, G.; Maricchiolo, G.; Genovese, L.; Pasquale, F. D.; Rosalba; Caruso; Denaro, M. G.; Delia, S.; Laganà, P., Comparative Study of Antibacterial and Haemolytic Activities in Sea Bass, European Eel and Blackspot Seabream. *The Open Marine Biology Journal* **2014**, *8*, 10-16.
4. Manivasagan, P.; Annamalai, N.; Ashokkumar, S.; Sampathkumar, P., Studies on the proteinaceous gel secretion from the skin of the catfish, *Arius maculatus* (Thunberg, 1792). *African Journal of Biotechnology* **2009**, *8*, (24), 7125-7129.
5. Subhashini, S.; Lavanya, J.; Jain, S.; Agihotri, T., Screening of Antibacterial and Cytotoxic Activity of Extracts From Epidermis and Epidermal Mucus of *Barbonymus Schwannfeldii* (Tinfoil Barb Fish). *International Journal of Research in Engineering and Technology* **2013**, *2*, (4), 492-497.
6. Islam, M. M.; Hossain, M. M. M.; Islam, M. S.; Shoumo; Khondoker; Khatun, M. A., Competitive antibacterial activity of two Indian majorcarps and two Chinese carps fish mucus against common pathogenic bacteria at aquaculture pond. *International Journal of Fisheries and Aquatic Studies* **2014**, *2*, (2), 158-162.
7. Balasubramanian, S.; Rani, P. B.; Prakash, A. A.; Prakash, M.; Senthilraja, P.; Gunasekaran, G., Antimicrobial properties of skin mucus from four freshwater cultivable Fishes (*Catla catla*, *Hypophthalmichthys molitrix*, *Labeo rohita* and *Ctenopharyngodon idella*). *African Journal of Microbiology Research* **2011**, *6*, (24), 5110-5120.
8. Dhanaraj, M.; Haniffa, M. A.; Singh, S. V. A.; Ramakrishnan, C. M.; Manikandaraja, D.; Milton, M. J., Antibacterial Activity of Skin and Intestinal Mucus of Five Different Freshwater Fish Species Viz., *Channa striatus*, *C. micropeltes*, *C. marulius*, *C. punctatus* and *C. gachua*. *Malaysian Journal of Science* **2009**, *28*, (3), 257-262.
9. Kuppulakshmi, C.; Prakash, M.; Gunasekaran, G.; Manimegalai, G.; Sarojini, S., Antibacterial properties of fish mucus from *Channa punctatus* and *Cirrhinus mrigala*. *European Review of Medical Pharmacological Science* **2008**, *12*, (3), 149-53.
10. Kumari, U.; Nigam, A. K.; Mittal, S.; Mittal, A. K., Antibacterial properties of the skin mucus of the freshwater fishes, *Rita rita* and *Channa punctatus*. *European Review for Medical and Pharmacological Sciences* **2011**, *15*, 781-786.
11. Wei, O. Y.; Xavier, R.; Marimuthu, K., Screening of antibacterial activity of mucus extract of snakehead fish, *Channa striatus*. *European Review for Medical and Pharmacological Sciences* **2010**, *14*, 675-681.
12. Ramesh, B., Assessment of Antimicrobial peptides from mucus of fish. *International Journal of Current Biotechnology* **2013**, *1*, (1), 5-8.
13. Haniffa, M. A.; Viswanathan, S.; Jancy, D.; Poomari, K.; Manikandan, S., Antibacterial studies of fish mucus from two marketed air-breathing fishes – *Channa striatus* and *Heteropneustes fossilis*. *International Research Journal of Microbiology* **2014**, *5*, (2), 22-27.
14. Nigam, A. K.; Kumari, U.; Mittal, S.; Mittal, A. K., Evaluation of antibacterial activity and innate immune components in skin mucus of Indian major carp, *Cirrhinus mrigala*. *Aquaculture Research* **2015**, *48*, (2), 407-418.
15. Elavarasi, K.; Ranjini, S.; Rajagopal, T.; Rameshkumar, G.; Ponmanickam, P., Bactericidal proteins of skin mucus and skin extracts from fresh water fishes, *Clarias batrachus* and *Tilapia mossambicus* *Thai Journal of Pharmaceutical Sciences* **2013**, *37*, (1), 194-200.
16. Loganathan, K.; Muniyan, M.; Prakash, A. A.; Raja, P. S.; Prakash, M., Studies on the Role of Mucus From *Clarias batrachus* (Linn) Against Selected Microbes. *International Journal of Pharmaceutical Applications* **2011**, *2*, (3), 202-206.
17. Kumari, S.; Tyor, A. K.; Bhatnagar, A., Evaluation of the antibacterial activity of skin mucus of three carp species. *International Aquatic Research* **2019**, *11*, 225-239.

18. Subramanian, S.; Ross, N. W.; MacKinnon, S. L., Comparison of antimicrobial activity in the epidermal mucus extracts of fish. *Comparative Biochemistry and Physiology Part B: Biochemistry and Molecular Biology* **2008**, 150, (1), 85-92. 73 74
19. Guardiola, F. A.; Cuesta, A.; Abellán, E.; Meseguer, J.; Esteban, M. A., Comparative analysis of the humoral immunity of skin mucus from several marine teleost fish. *Fish & Shellfish Immunology* **2014**, 40, (1), 24-31. 75 76
20. Magarinos, B.; Pazos, F.; Santos, Y.; Romalde, J. L.; Toranzo, A. E., Response of *Pasteurella piscicida* and *Flexibacter maritimus* to skin mucus of marine fish. *Diseases of Aquatic Organisms* **1995**, 21, 103-108. 77 78
21. Manikantan, G.; Lyla, S.; Khan, S. A.; Vijayanand, P.; Jothi, G. E. G., Bioactive potency of epidermal mucus extracts from greasy grouper, *Epinephelus tauvina* (Forsskal, 1775). *Journal of Coastal Life Medicine* **2016**, 4, (7), 510-520. 79 80
22. Tyor, A. K.; Kumari, S., Biochemical characterization and antibacterial properties of fish skin mucus of fresh water fish, *Hypophthalmichthys nobilis*. *International Journal of Pharmacy and Pharmaceutical Sciences* **2016**, 8, (6), 132-136. 81 82
23. Hellio, C.; Pons, A. M.; Beaupoil, C.; Bourgougnon, N.; Gal, d. s. Y. L., Antibacterial, antifungal and cytotoxic activities of extracts from fish epidermis and epidermal mucus. *International Journal of Antimicrobial Agents* **2002**, 20, 214-219. 83 84
24. Katra, N.; Hisar, O.; Yilmaz, S.; Turgay, E.; Sarvan, C.; Suheyli; Karatas, *In vitro* antimicrobial activities of extracts from ballan wrasse (*Labrus bergylta*) skin mucus. *Marine Science and Technology Bulletin* **2016**, 5, (1), 13-15. 85 86
25. García-Marciano, M.; Apún-Molina, J. P.; Sainz-Hernández, J. C.; Santamaría-Miranda, A.; Medina-Godoy, S.; Aguiñaga-Cruz, J. A., Antibacterial activity evaluation of the Nile tilapia *Oreochromis niloticus* (Linnaeus, 1758) skin mucus, against *Vibrio* bacteria affecting the white shrimp *Penaeus vannamei*. *Latin American Journal of Aquatic Research* **2019**, 47, (3), 580-585. 87 88 89
26. Mahadevan, G.; Mohan, K.; Vinoth, J.; Ravi, V., Biotic potential of mucus extracts of giant mudskipper *Periophthalmodon schlosseri* (Pallas, 1770) from Pichavaram, southeast coast of India. *The Journal of Basic and Applied Zoology* **2019**, 80, (1), 13. 90 91
27. Guardiola, F. A.; Cuartero, M.; Collado-González, M. d. M.; Díaz-Baños, F. G.; Cuesta, A.; Morifiño, M. Á.; Esteban, M. Á., Terminal carbohydrates abundance, immune related enzymes, bactericidal activity and physico-chemical parameters of the Senegalese sole (*Solea senegalensis*, Kaup) skin mucus. *Fish & Shellfish Immunology* **2017**, 60, 483-491. 92 93 94
28. Bergsson, G.; Agerberth, B.; Jörmvall, H.; Gudmundsson, G. H., Isolation and identification of antimicrobial components from the epidermal mucus of Atlantic cod (*Gadus morhua*). *The FEBS Journal* **2005**, 272, 4960-4969. 95 96
29. Wibowo, A.; Fadjar, M.; Maftuch, Utilization of Tilapia Mucus to Inhibit *Vibrio harveyi* on Vannamei (*Litopenaeus vannamei*). *Journal of Life Science and Biomedicine* **2015**, 5, (5), 141-148. 97 98
30. Lirio, G. A. C.; Leon, J. A. A. D.; Villafuerte, A. G., Antimicrobial Activity of Epidermal Mucus from Top Aquaculture Fish Species against Medically-Important Pathogens. *Walailak Journal* **2018**, 16, (5), 329-340. 99 100
31. Patel, M.; Ashraf, M. S.; Siddiqui, A. J.; Ashraf, S. A.; Sachidanandan, M.; Snoussi, M.; Adnan, M.; Hadi, S., Profiling and Role of Bioactive Molecules from *Puntius sophore* (Freshwater/Brackish Fish) Skin Mucus with Its Potent Antibacterial, Antiadhesion, and Antibiofilm Activities. *Biomolecules* **2020**, 10, (6). 101 102 103
32. Sanahuja, I.; Fernández-Alacid, L.; Ordóñez-Grande, B.; Sánchez-Nuño, S.; Ramos, A.; Araujo, R. M.; Ibarz, A., Comparison of several non-specific skin mucus immune defences in three piscine species of aquaculture interest. *Fish & Shellfish Immunology* **2019**, 89, 428-436. 104 105 106
33. Patil, R. N.; Kadam, J. S.; Ingole, J. R.; Sathe, T. V.; Jadhav, A. D., Antibacterial activity of fish mucus from *Clarias batrachus* (Linn.) against selected microbes. *Biolife* **2015**, 3, (4), 788-791. 107 108
34. Fuochi, V.; Volti, G. L.; Camiolo, G.; Tiralongo, F.; Giallongo, C.; Distefano, A.; Petronio, G. P.; Barbagallo, I.; Viola, M.; Furneri, P. M.; Rosa, M. D.; Avola, R.; Tibullo, D., Antimicrobial and Anti-Proliferative Effects of Skin Mucus Derived from *Dasyatis pastinaca*. *Marine drugs* **2017**, 15, (11). 109 110 111
35. Hisar, O.; Hisar, S. A.; Uyanik, M. H.; Sahin, T.; Cakir, F.; Yilmaz, S., *In vitro* antimicrobial and antifungal activities of aqueous skin mucus from rainbow trout (*Oncorhynchus mykiss*) on human pathogens. *Marine Science and Technology Bulletin* **2014**, 3, (1), 19-22. 112 113 114 115
